# Supplementary material for: A new strategy for the sensitive electrochemical determination of nitrophenol isomers using β-cyclodextrin derivative-functionalized silicon carbide
Source: Royal Society of Chemistry journal article supplement (doi:10.1039/c7ra12715d), 2018-01-01
Supplement: c7ra12715d1.pdf [file c7ra12715d1.pdf]

23 from Aladdin Chemical Co. (Southern California, USA). N,N-dimethylformamide  
24 (DMF) was purchased from Tianjin Zhiyuan Chemical Reagent Co., Ltd. Sodium  
25 borohydride (NaBH<sub>4</sub>, 98%) was purchased from Tianjin great chemical reagent  
26 factory. All other reagents were of analytical grade. All aqueous solutions were  
27 prepared with deionized water (DW, 18 MΩ cm).

28

### 29 *SI.2. Apparatus*

30 The morphologies of the prepared samples were characterized by a JEM 2100  
31 transmission electron microscopy (TEM, Japan). Fourier transform infrared (FTIR)  
32 study was performed over the wavenumber, range of 4000–400 cm<sup>-1</sup> by a Thermo  
33 Fisher SCIENTIFIC Nicolet IS10 (Massachusetts, USA) FTIR impact 410  
34 spectrophotometer using KBr pellets. Thermogravimetric analysis (TGA) was carried  
35 out on a Q50 TGA (TA Instruments, New Castle, USA), from 25 to 800 °C in argon  
36 at a heating rate of 5 °C min<sup>-1</sup>. Electrochemical impedance spectroscopy (EIS), cyclic  
37 voltammetry (CV), and differential pulse voltammetry (DPV) experiments were  
38 performed with a CHI 660E Electrochemical Workstation from Shanghai Chen-hua  
39 Instrument (Shanghai, China) and conducted using a three-electrode system, with the  
40 modified GCE as working electrode, a platinum wire as the counter electrode, a  
41 saturated calomel electrode (SCE) as the reference electrode.

42

### 43 *SI.3. Synthesis of carboxyl silicon carbide (CSiC)*

44 CSiC was synthesized according to a previous study.<sup>1</sup> Firstly, SiC-OH was

45 prepared through a hydrothermal reaction of glucose. Briefly, 50 mg of SiC and 200  
46 mg of glucose were dispersed in 60 mL of DW *via* sonication, the suspension was  
47 transferred to an autoclave and kept at 180 °C for 8 h. After reaction, the autoclave  
48 was cooled naturally. The suspension was centrifuged and washed with DW and  
49 alcohol for 3 times, respectively. SiC-OH was obtained by freeze-drying. Secondly,  
50 the obtained SiC-OH was dispersed in 30 mL of ethanol *via* sonication, and then 1.0  
51 mL of APTES was added to the suspension with vigorous stirring. After stirring for  
52 12 h, the resulting mixture was cleaned with ethanol for 3 times. SiC-NH<sub>2</sub> was  
53 obtained by freeze-drying. Thirdly, a dispersion of SiC-NH<sub>2</sub> in 20 mL DMF was  
54 added dropwise to a flask containing 20 mL of 0.1 M succide anhydride in DMF. The  
55 mixture was stirred for 24 h, the resulting SiC nanoparticles with carboxylic-function  
56 groups at their surface (CSiC) were washed with DMF, alcohol, and DW for 3 times.  
57 Finally, CSiC was obtained by freeze-drying.

58

#### 59 *S1.4. Preparation of Au@CSiC-SH/NH<sub>2</sub>-CD composite material*

60 Au@CSiC-SH/NH<sub>2</sub>-CD composite material was synthesized according to a  
61 previous work <sup>1,2</sup> with some modifications. Briefly, 5 mg of CSiC was dissolved in 5  
62 ml of DMF, and 130 μL of chloroauric acid was added. Similarly, 10 mg of SH-CD  
63 and 0.9 mg of sodium borohydride were dissolved in 5 mL of DMF, and then the  
64 mixture of CSiC and chloroauric acid was added quickly dropwise to the above  
65 solution under stirring for 6 h. The resulted suspension was centrifuged and washed  
66 with DW for 3 times followed by freeze-drying to obtain Au@CSiC-SH-CD. The

67 Au@CSiC composite was prepared using the similar process of Au@CSiC-SH-CD in  
68 the absence of SH- $\beta$ -CD. Then 20 mg of Au@CSiC-SH-CD, the carboxyl groups on  
69 which have been activated by 10 mL of EDC/NHS (0.5 mM) under stirring for 2 h,  
70 was added into the above mixture and stirred for another 5 h. After that, the mixture  
71 was centrifuged and washed with DW for 3 times. The final Au@CSiC-SH/NH<sub>2</sub>-CD  
72 composite product was obtained by freeze-drying.

73

#### 74 *S1.5. Fabrication of the modified electrodes*

75 A glassy carbon electrode (GCE, 3 mm in diameter) was polished with 0.3 and 0.05  
76  $\mu\text{m}$  Al<sub>2</sub>O<sub>3</sub> powder respectively and subsequently sonicated in ethanol and DW to  
77 remove the physically adsorbed substance and dried in air. The CSiC, Au@CSiC,  
78 Au@CSiC-SHCD, or Au@CSiC-SH/NH<sub>2</sub>-CD was dissolved in DW respectively at a  
79 concentration of 1.0 mg/mL with the aid of ultrasonic agitation for 20 min, resulting  
80 in a homogeneous suspension. To prepare the materials modified electrode, 5  $\mu\text{L}$   
81 of the suspension was dropped onto the electrode surface and dried at room  
82 temperature. The obtained electrode was noted as the CSiC/GCE, Au@CSiC/GCE,  
83 Au@CSiC-SHCD/GCE, and Au@CSiC-SH/NH<sub>2</sub>-CD/GCE electrode.

84

#### 85 *S1.6. Electrochemical measurements*

86 CV was carried out in 0.1 M PBS (pH 6.0) containing 1 mM o-NP and p-NP. DPV  
87 was performed in 0.1 M PBS (pH 6.0) containing different concentrations of o-NP  
88 and p-NP by scanning the potential from -0.2 to 1.2 V with a pulse amplitude of 0.05

89 V and a pulse width of 0.05 s. EIS was recorded in the frequency range from  $10^{-1}$  to  
90  $10^{-5}$  Hz with an amplitude of 5 mV using 2.0 mM  $[\text{Fe}(\text{CN})_6]^{3-/4-}$  redox couple (1:1)  
91 with 0.1 M KCl as supporting electrolyte. All the measurements were carried out at  
92 room temperature.

93

#### 94 *S1.7. Molecular docking*

95 Crystal structure of  $\beta$ -CD (ID: IHEGEL) was obtained from Crystallography Open  
96 Database (<http://www.crystallography.net/>). The structures of nitrophenol isomers were  
97 constructed by the UCSF Chimera software. The  $\beta$ -CD and nitrophenol isomers  
98 structures were fully optimized by the UCSF Chimera software. Hydrogen atoms  
99 were added using the Dock Prep module. The GAFF force field and the AM1-BCC  
100 charges were used. The optimized structures were used as a starting structure in the  
101 docking study. For the molecular docking study, the molecular surface of the  $\beta$ -CD  
102 molecule was generated using the DMS tool with a probe radius of 1.4 Å. The sphgen  
103 module was applied to generate spheres surrounding the binding site. The Grid  
104 module of DOCK6 was employed to generate Grid file which was used in scoring in  
105 the subsequent docking procedure. The flexible docking method was utilized  
106 producing 1000 different conformational orientations for the guest molecule. The  
107 electrostatic interactions and van der Waals forces were calculated based on the grids.  
108 Finally, clustering analysis with root-mean-square deviation (RMSD) threshold of 2.0  
109 Å was performed to retain the best results.

110

111

112 **References**

- 113 [1] L. Yang, H. Zhao, C. P. Li, S. Fan, B. Li, Dual  $\beta$ -cyclodextrin functionalized  
114 Au@SiC nanohybrids for the electrochemical determination of tadalafil in the  
115 presence of acetonitrile, *Biosens. Bioelectron.* 64 (2015), 126-130.
- 116 [2] L. Yang, S. Fan, G. Deng, Y. Li, X. Ran, H. Zhao, C. P. Li, Bridged  
117  $\beta$ -cyclodextrin-functionalized MWCNT with higher supramolecular recognition  
118 capability: The simultaneous electrochemical determination of three phenols  
119 *Biosens. Bioelectron.* 68 (2015) 617–625.
- 120
